# Supplementary material
Source: PubMed Central journal article supplement (PMC4333097)
Supplement: MCB.01105-14_zmb999100758so1.pdf [file MCB.01105-14_zmb999100758so1.pdf]

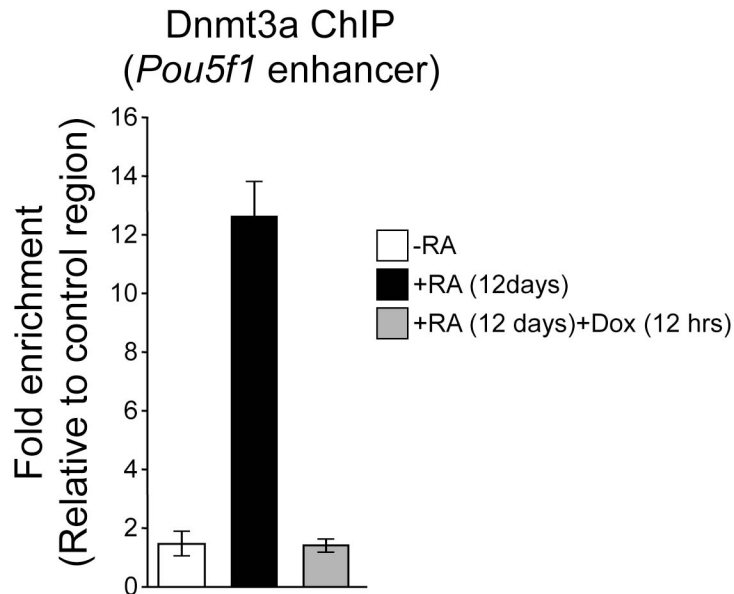

**Supplemental Fig. S1. Association of Dnmt3a by conventional ChIP-qPCR.** Dnmt3a association with the *Pou5f1* enhancer was monitored by ChIP-qPCR using undifferentiated ESCs, ESCs differentiated for 12 d, and 12 d differentiated cells given a 12 hr pulse of doxycycline to induce ectopic Oct4. Enrichment was quantified relative to a standard input DNA titration, relative to an isotype control antibody, and relative to a control amplicon as described in the methods section.
