# Supplementary material
Source: PubMed Central journal article supplement (PMC4333097)
Supplement: MCB.01105-14_zmb999100758so2.pdf [file MCB.01105-14_zmb999100758so2.pdf]

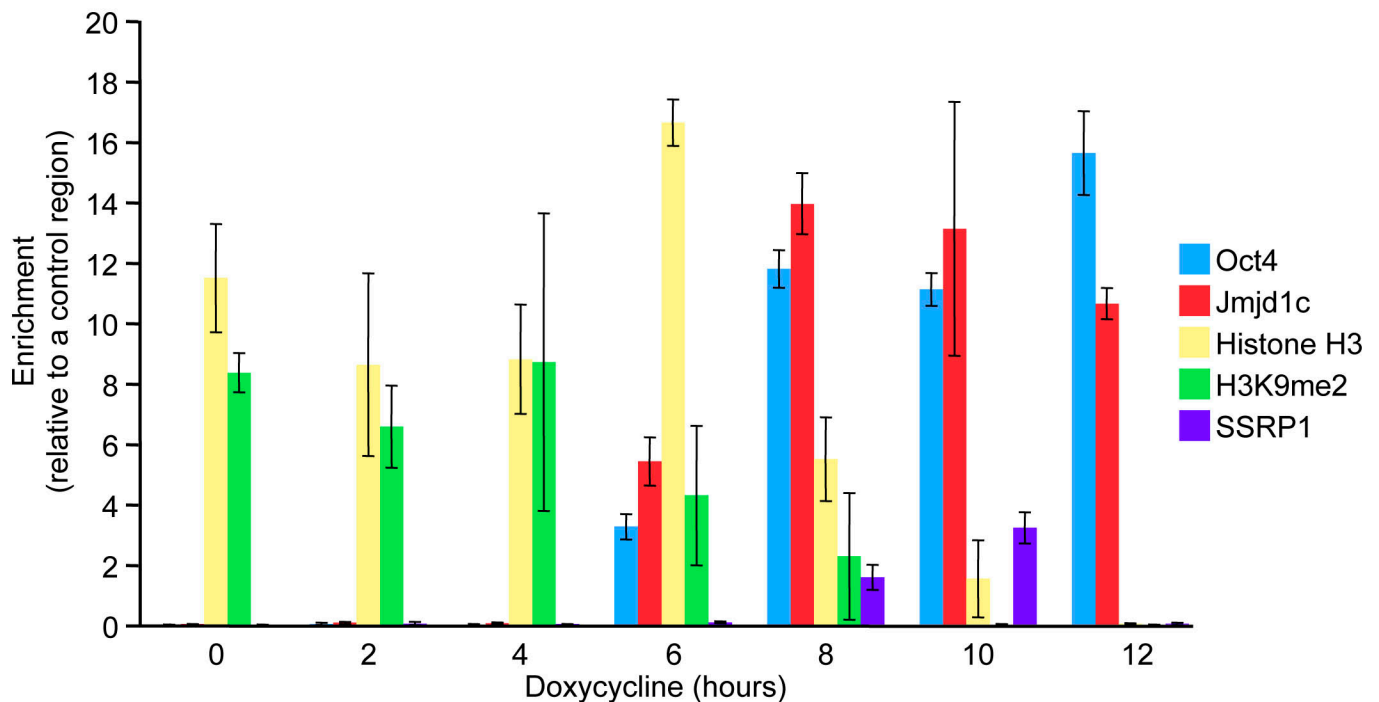

**Supplemental Fig. S2. Stepwise recruitment of Jmjd1c and FACT correlates with depletion of H3K9me2 and H3, respectively.**

Identical to Fig. 3E except non-normalized ChIP enrichment is shown. Enrichment is shown relative to an isotype control antibody and relative to a control region. Experiment was performed in biological triplicate. Error bars depict standard deviation. Differences in maximum height are due to intrinsic differences in the antibodies.
