# Supplementary material
Source: PubMed Central journal article supplement (PMC4333097)
Supplement: MCB.01105-14_zmb999100758so3.pdf [file MCB.01105-14_zmb999100758so3.pdf]

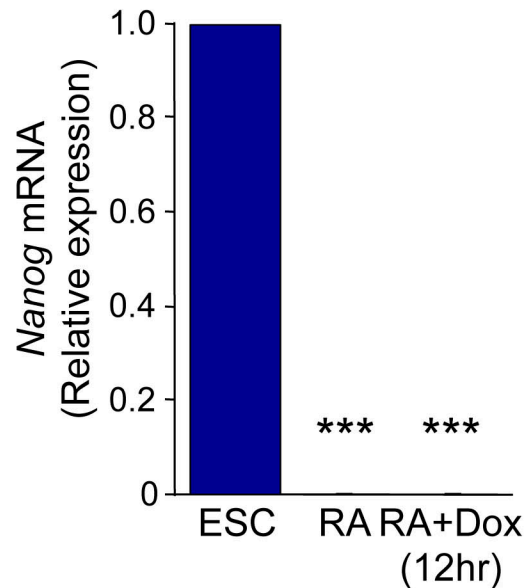

**Supplemental Fig. S3. *Nanog* expression is unaltered in differentiating ESCs treated for 10 hr with a pulse of doxycycline to induce ectopic Oct4.** Identical to Fig. 3H except *Nanog* rather than endogenous *Pou5f1* expression is shown. Primer-pairs for cDNA amplification are taken from Takahashi, Kazutoshi et al., *Cell* 126:4 663 - 676.
